# Supplementary material for: Host inflammatory response is the major factor in the progression of Chlamydia psittaci pneumonia
Source: Front Immunol. 2022 Sep 2;13:929213. doi: 10.3389/fimmu.2022.929213 (PMC9478202; doi:10.3389/fimmu.2022.929213)
Supplement: Supplementary file 5 [file Table_5.xlsx]

## Sheet: Obs Conc
Table S5. Concentrations of 48 serum cytokines/chemokines in different populations
		CTACK	Eotaxin	FGF basic	G-CSF	GM-CSF	GRO-a	HGF	IFN-a2	IFN-g	IL-1a	IL-1b	IL-1RA	IL-2	IL-2Ra	IL-3	IL-4	IL-5	IL-6	IL-7	IL-8	IL-9	IL-10	IL-12(p70)	IL-12(p40)	IL-13	IL-15	IL-16	IL-17A	IL-18	IP-10	LIF	MCP-1(MCAF)	MCP-3	M-CSF	MIF	MIG	MIP-1a	MIP-1b	b-NGF	PDGF-BB	RANTES	SCF	SCGF-b	SDF-1a	TNF-a	TNF-b	TRAIL	VEGF-A
Pneumonia	P1	216.76	25.73	73.44	101.05	13.79	614.57	377.95	36.31	27.47	23.03	6.15	1026.91	6.221	122.35	0.79	5.12	OOR <	15	40.88	17.18	78.8	8.49	*20.65	OOR <	6.8	OOR <	127.12	21.61	20.23	253.93	121.66	18.93	5.27	27.76	937.25	164.96	4.05	95.73	*4.00	3221.63	1497.47	65.59	51092.1	327.97	119.43	123.67	110.87	OOR <
	P2	553.85	35.63	77.8	95.64	5.68	1278.66	391.78	30.74	21.35	25.53	7.43	862.73	9.83	123.7	*0.45	4	OOR <	66	24.91	9.87	160.32	4.31	*3.44	OOR <	7.16	OOR <	351.25	22.96	119.52	163.26	70.97	22.26	3.11	40.37	2806.82	95.89	3.54	169.15	*3.65	4149.12	8817.5	121.78	145706	387.74	100.71	223.88	96.5	OOR <
	P3	289.99	5.03	81.97	118.56	OOR <	732.4	342.68	39.26	34.98	28.8	5.27	1892.73	8.65	98.84	OOR <	3.2	OOR <	55.08	OOR <	2.54	143.56	6.54	OOR <	OOR <	2.56	OOR <	87.06	13.34	180.94	2411.16	45.99	19.56	3.22	95.77	1041.08	607.06	5.61	196.4	*2.08	1170.79	3900.01	60.4	87608.7	175.9	69.17	238.56	108.04	OOR <
	P4	200.34	8.83	73.44	52.52	OOR <	834.11	388.77	24.43	10.85	*9.99	6.92	780.88	OOR <	57.93	OOR <	3.1	OOR <	62.36	15.37	22.17	135.56	2.68	OOR <	OOR <	3.55	OOR <	142.22	24.3	101.76	524.84	64.92	19.25	3.04	25.66	1015.96	183.43	2.8	161.52	*1.91	1985.81	3802.84	48.09	72925.3	260.87	104.66	244.29	114.47	OOR <
	P5	316.18	16.5	74.55	86.43	OOR <	764.95	297.06	26.33	25.44	*24.46	6.43	392.31	7.55	111.41	OOR <	3.1	OOR <	23.19	10.92	15	162.17	5.68	*3.44	OOR <	3.07	OOR <	133.48	17.51	87.48	722.27	45.99	17.98	0.36	39.7	1530.7	260.21	4.16	208.14	*2.34	2662.78	4205.69	75.86	73174	220.13	54.32	271.29	127.03	OOR <
	P6	274.76	8.17	73.44	96.8	OOR <	851.01	169.53	29.89	19.29	28.01	7.44	864	OOR <	79.32	OOR <	3.29	OOR <	32.78	15.37	12.3	180.11	2.54	OOR <	OOR <	4.01	OOR <	88	22.29	52.25	119.38	88.52	22.99	4.11	30.18	1218.79	57.82	2.96	187.54	*2.78	1646.23	3078.26	50.45	90676.9	231.03	108.53	252.53	104.79	OOR <
	U1	323.28	12.58	81.97	52.52	OOR <	810.87	376.71	28.15	27.47	33.87	10.68	1981.88	OOR <	87.38	*0.17	4.41	OOR <	42.87	17.43	9.87	159.4	9.21	*12.86	OOR <	4.44	OOR <	124.08	26.97	141.62	511.37	94.2	17.98	5.53	68.09	1480.88	149.79	3.11	192.96	*3.65	1024.75	6815.3	81.51	143870	294.23	116	275.56	93.98	OOR <
	U3	483.85	32.56	85.96	180.94	14.62	715.65	447.88	42.76	48.29	30.47	11.25	1923.29	6.57	121.67	0.79	5.42	OOR <	47.62	33.25	36.44	147.3	2.21	*24.27	OOR <	13.43	OOR <	109.41	26.97	103.33	1296.12	94.2	68	1.64	105.67	1560.32	154.21	7.04	176.5	*5.04	566.77	4740.81	333.27	213540	453.09	133.26	228.11	86.27	OOR <
Recovery	P1	198.16	17.8	91.66	137.08	OOR <	381.09	463.01	23.44	55.59	20.5	4.91	612.55	OOR <	241.98	OOR <	2.91	OOR <	6.86	OOR <	17.81	114.14	*4.31	OOR <	OOR <	2.56	OOR <	92.69	13.34	194.84	2653.51	67.96	24.26	*0.36	141.72	822.43	1537.84	8.54	122.35	*2.78	502.1	1372.75	123.94	103969	387.74	96.88	200.31	105.6	OOR <
	P2	426.25	27.36	71.17	*26.44	OOR <	OOR <	161.68	9.62	13	*6.26	3.69	50.73	OOR <	84.47	9.01	2.07	OOR <	OOR <	OOR <	OOR <	24.47	OOR <	OOR <	OOR <	2	OOR <	97.67	*0.41	71.93	143.36	45.99	37.97	OOR <	34.97	520.96	105.93	2.45	43.04	*0.84	58.24	217.5	92.14	78497.1	283.43	26.15	47.41	39.66	OOR <
	U1	287.4	15.11	58.7	*23.71	5.68	423.41	167.57	18.04	22.38	*5.29	4.43	50.73	OOR <	60.3	2.06	2.5	OOR <	12.36	*5.64	OOR <	127.52	OOR <	OOR <	OOR <	8.2	OOR <	53.68	*7.57	40.92	102.66	45.99	31.6	5.27	22.84	436.81	56.25	2.05	116.38	*2.08	172.53	3790.69	78.13	104526	306.81	57.75	172.32	71.55	OOR <
Bronchitis	S1	513.29	20.8	79.91	60.97	OOR <	897.26	272.2	28.15	21.35	*16.21	5.15	490.27	OOR <	72.59	OOR <	3.56	OOR <	OOR <	19.39	2.17	203.28	OOR <	OOR <	OOR <	2.82	OOR <	260.82	16.13	59.51	215.57	105.36	29.84	OOR <	21.06	2860.75	78.91	2.63	197.43	*2.61	3018.96	7454.53	62.13	128114	364.13	41.75	297.19	104.79	OOR <
	S2	448.33	46.98	95.29	65.07	5.68	1513.65	300.87	37.06	32.49	13.87	5.84	427.92	4.32	107.25	OOR <	3.74	OOR <	OOR <	26.66	23.97	207.8	OOR <	*5.26	OOR <	3.07	OOR <	1418.3	25.64	95.89	121.07	97.01	36.02	OOR <	31.9	4681.08	79.55	2.8	232.49	*4.87	2669.51	10384.2	96.02	104410	394.68	55.6	318.44	148.91	OOR <
	S4	522.69	24.53	75.65	43.64	OOR <	2217.91	327.51	32.39	23.91	*11.80	4.43	409.75	OOR <	80.06	OOR <	3.29	OOR <	5.51	21.29	9.17	191.96	3.58	*1.30	OOR <	2.56	OOR <	782.29	16.13	46.37	194.3	94.2	26.59	4.53	29.14	3596.13	38.68	2.54	207.54	*3.22	2574.47	8661.32	82.63	142284	382.31	68.16	283.09	125.48	OOR <
	S5	440.92	27.36	73.44	48.15	OOR <	919.3	231.8	26.33	16.17	18.87	4.68	312.68	OOR <	72.59	OOR <	3.82	OOR <	14.13	19.39	OOR <	189.23	9.57	*8.50	OOR <	3.07	OOR <	290.07	17.51	61.43	105.6	79.84	20.48	1.39	28.1	2440.4	71.62	2.26	197	*2.61	2046.2	5647.21	44.51	117310	371.72	65.93	281.59	101.08	OOR <
	S6	468.99	31.83	85.96	41.33	OOR <	966	384.25	40.68	25.44	*17.08	4.68	563.36	OOR <	72.59	OOR <	3.47	OOR <	24.16	15.37	7	191.96	2.21	*6.11	OOR <	2.56	OOR <	1034.33	20.25	63.35	199.96	70.97	28.82	3.22	26.19	4504.22	62.37	2.63	195.19	*3.31	3737.88	6028.29	78.13	93707.8	428.59	50.46	281.08	110.47	OOR <
	T1	225.27	13.01	71.17	65.07	OOR <	641.15	323.71	26.33	26.96	*12.69	3.57	1082.25	OOR <	63.42	OOR <	3.1	OOR <	35.4	17.43	7	172.32	7.38	*12.16	OOR <	3.55	OOR <	1039.37	20.25	105.18	1709.66	58.76	40.32	OOR <	64.89	2052.32	328.9	3.4	167.25	*2.34	471.72	3237.88	63.29	115801	254.33	73.67	214.69	94.4	OOR <
	T2	790.97	37.07	84.97	56.8	OOR <	877.59	268.37	27.25	21.87	26.36	5.15	349.68	OOR <	101.66	OOR <	3.47	OOR <	5.033	13.22	OOR <	182.39	OOR <	OOR <	OOR <	3.07	OOR <	142.22	21.61	56.61	1197.44	82.75	30.6	OOR <	35.48	2297.93	141.65	3.03	206.51	*2.96	1844.11	6997.19	93.81	87700.2	308.69	60.77	279.58	112.88	OOR <
	T3	752.61	55.84	96.18	91.98	15.8	822.19	239.52	33.2	23.4	12.1	5.61	497.22	2.214	129.09	*0.09	4.65	OOR <	8.35	24.91	2.17	193.32	3.558	*1.30	OOR <	3.78	OOR <	1048.53	26.97	71.46	219.43	110.85	50.08	1.11	42.37	3346.98	78.91	4.28	228.23	*3.65	1952.46	4975.46	72.45	100675	347.04	66.241	269.54	121.58	OOR <
	U2	695.12	49.36	66.43	71.07	OOR <	873.33	258.77	37.8	21.87	22.19	4.91	821.59	OOR <	71.08	OOR <	3.91	130.46	6.522	18.42	11.94	177.82	1.804	OOR <	OOR <	3.07	OOR <	98.29	16.82	72.88	140.02	82.75	40.43	2.09	35.82	1808.75	117.49	3.11	209	*3.13	2034.32	9680.92	52.81	112418	389.25	44.388	275.06	103.97	OOR <
Healthy	H1	336.83	24.03	68.83	38.99	OOR <	794.01	224.07	24.43	18.25	*10.90	3.69	104.07	OOR <	77.09	OOR <	2.5	OOR <	0.416	8.43	3.05	162.64	OOR <	*1.30	OOR <	7.86	OOR <	87.68	16.13	63.83	93.41	58.76	24.82	1.11	26.71	513.99	76.3	2.45	174.17	*2.43	1252.38	6674.43	71.31	108067	385.93	48.33	241.05	98.18	OOR <
	H2	208.23	18.24	65.2	84.55	3.85	1122.69	153.8	23.44	27.47	*11.80	2.65	392.31	OOR <	104.46	OOR <	1.84	OOR <	OOR <	13.22	OOR <	175.99	OOR <	*3.44	OOR <	3.07	OOR <	53.68	17.51	73.83	98.67	52.46	37.06	1.64	44.04	436.81	850.48	3.92	177.97	*3.65	2547.75	8787.11	78.13	90287.2	396.18	33.91	248.04	103.56	OOR <
	H3	164.57	17.58	75.65	45.91	7.79	749.64	141.94	28.15	19.29	*16.21	3.69	158.38	OOR <	61.08	*0.45	3.65	OOR <	0.8	23.13	OOR <	162.17	OOR <	*4.37	OOR <	4.01	OOR <	52.36	21.61	44.89	129.85	58.76	20.48	1.43	19.98	1256.94	59.36	2.88	165.51	6.43	739.88	4511.66	78.13	60944.7	358.04	67.75	209.73	100.67	OOR <
	H4	184.17	20.58	68.83	OOR <	OOR <	648.57	106.05	22.43	8.68	*3.30	2.65	OOR <	OOR <	41.58	OOR <	2.91	OOR <	OOR <	*5.64	OOR <	136.04	0.86	OOR <	OOR <	2.56	OOR <	47.71	13.34	40.42	163.26	52.46	18.3	OOR <	24.25	559.09	63.11	1.82	160.82	*2.08	647.78	3535.4	63.29	62763.5	287.25	38.76	254.03	88	OOR <
	H5	222	16.54	68.83	65.07	OOR <	1197.28	229.87	20.31	14.59	*1.15	2.51	OOR <	0.21	58.72	OOR <	1.95	OOR <	1.152	OOR <	OOR <	159.4	OOR <	OOR <	OOR <	2	OOR <	43.34	*8.31	34.88	114.23	35.92	30.35	OOR <	18.53	2166.46	53.03	3.26	180.04	*2.69	1886.42	4169.9	63.86	79405.3	325.19	38.07	233.58	100.67	OOR <
	H6	343.28	22.28	63.94	*20.87	6.07	824.43	224.07	28.15	18.25	*15.34	5.84	400.44	0.116	57.93	OOR <	2.71	OOR <	OOR <	12.09	*0.06	176.45	0.354	*12.86	OOR <	11.39	OOR <	79.25	16.13	45.88	73.57	64.92	24.54	1.172	24.43	520.96	45.31	3.11	221.14	*2.26	1702.1	5995.72	91.58	93248	246.08	80.41	266.53	88.43	OOR <
	H7	286.43	18.39	61.37	*2.72	OOR <	984.15	208.57	18.04	12.47	*9.99	2.92	*29.15	0.244	49.08	OOR <	2.07	OOR <	1.267	8.43	OOR <	169.56	OOR <	OOR <	OOR <	2.56	OOR <	111.86	13.34	48.34	74.35	25.2	38.2	0.328	21.59	387.67	32.38	2.05	178.84	*2.78	1030.07	6848.41	37.27	84685.6	358.65	26.15	221.4	88	OOR <
	H8	353.59	31.62	71.17	38.99	OOR <	1005.82	241.45	29.89	27.47	20.5	4.43	187.94	OOR <	84.47	*0.17	2.91	OOR <	0.168	24.91	7	162.17	0.22	*3.44	OOR <	4.44	OOR <	140.72	20.25	61.91	86.22	67.96	37.41	OOR <	30.87	338.77	59.36	2.63	175.47	*3.22	2291.84	5868.63	67.31	102529	368.68	15.97	239.06	103.97	OOR <
	H9	297.43	12.82	77.8	OOR <	27.47	797.87	165.61	24.43	15.12	*4.31	3.69	OOR <	0.104	61.08	OOR <	2.5	OOR <	1.624	OOR <	OOR <	168.64	1.022	*1.30	OOR <	2	OOR <	97.67	*9.04	47.35	106.25	32.43	15.29	0.36	26.71	797.49	43.48	1.94	175.04	*2.52	858.56	5087.8	48.68	81246.3	245.75	28.347	273.55	92.28	OOR <
	H10	351.02	27.71	80.94	73.04	OOR <	1203.28	212.45	22.43	17.21	22.19	5.15	282.73	0.158	69.56	OOR <	3.01	OOR <	0.825	21.29	*1.22	198.76	OOR <	OOR <	OOR <	2.56	OOR <	94.56	20.25	36.4	121.68	64.92	19.87	OOR <	20.88	1072.28	80.83	2.71	213.02	*2.61	2805.91	8046.26	75.86	88958.6	361.69	18.304	305.27	118.44	OOR <
	H11	291.61	6.64	71.17	*14.73	OOR <	856.09	196.9	27.25	15.12	*12.69	2.92	214.45	0.301	61.08	OOR <	3.1	OOR <	0.256	8.43	OOR <	175.53	0.508	*2.43	OOR <	2.82	OOR <	75.04	20.25	59.99	118.14	58.76	21.08	OOR <	24.96	882.54	66.02	2.8	196.14	*2.26	2298.95	6249.5	57.49	91594.5	358.65	6.311	240.8	108.04	OOR <
	H12	333.93	14.88	63.94	*17.89	OOR <	1632.3	247.23	20.31	20.32	*10.90	4.43	367.16	0.228	67.27	OOR <	2.4	OOR <	1.104	10.92	OOR <	167.71	0.436	*1.30	OOR <	5.67	OOR <	111.86	17.51	66.46	92.2	58.76	21.38	OOR <	21.06	1463.05	65.3	2.45	196.4	*2.17	2802.52	6010.39	116.89	102901	342.14	12.066	266.53	118.04	OOR <
*Value = Value extrapolated beyond standard range; OOR< = Out of Range Below
